# Supplementary material for: Macrophage-Derived Iron-Bound Lipocalin-2 Correlates with Renal Recovery Markers Following Sepsis-Induced Kidney Damage
Source: MDPI journal article supplement (doi:10.3390/ijms21207527), 2020-10-13
Supplement: s1 [file s1]

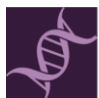

Article

# Supplemental Materials: Macrophage-derived iron-bound lipocalin-2 correlates with renal recovery markers following sepsis-induced kidney damage

Christina Mertens<sup>1#</sup>, Laura Kuchler<sup>1#</sup>, Anna Sola<sup>2</sup>, Roser Guiteras<sup>2</sup>, Stephan Grein<sup>3</sup>, Bernhard Brüne<sup>1,4</sup>, Andreas von Knethen<sup>1,4,5</sup>, Michaela Jung<sup>1\*</sup>

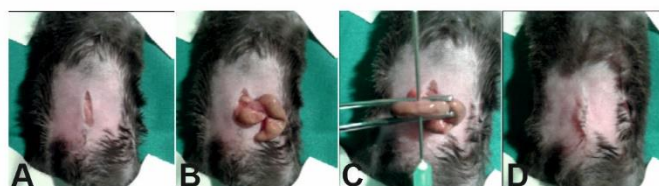**Supplemental Figure S1: Cecal puncture and ligation model**

For polymicrobial sepsis induction, we used the following CLP model: For CLP surgery, mice were anesthetized, and the abdominal cavity is opened via a midline laparotomy incision of about 3 cm in an aseptic fashion (A). The cecum was exposed (B) and 2/3 of the cecum is ligated distal to the ileocecal valve, taking care to maintain bowel continuity. The ligated cecum was punctured 'through-and-through' with a 20-gauge needle (C). Next, sufficient pressure was applied to the cecum to extrude a single droplet of fecal material from each puncture site. The abdomen is closed in two layers (D), and mice are resuscitated with 1 ml of 0.9% NaCl. Mice subjected to sham laparotomy (Sham) underwent the same procedure without ligation and puncture.

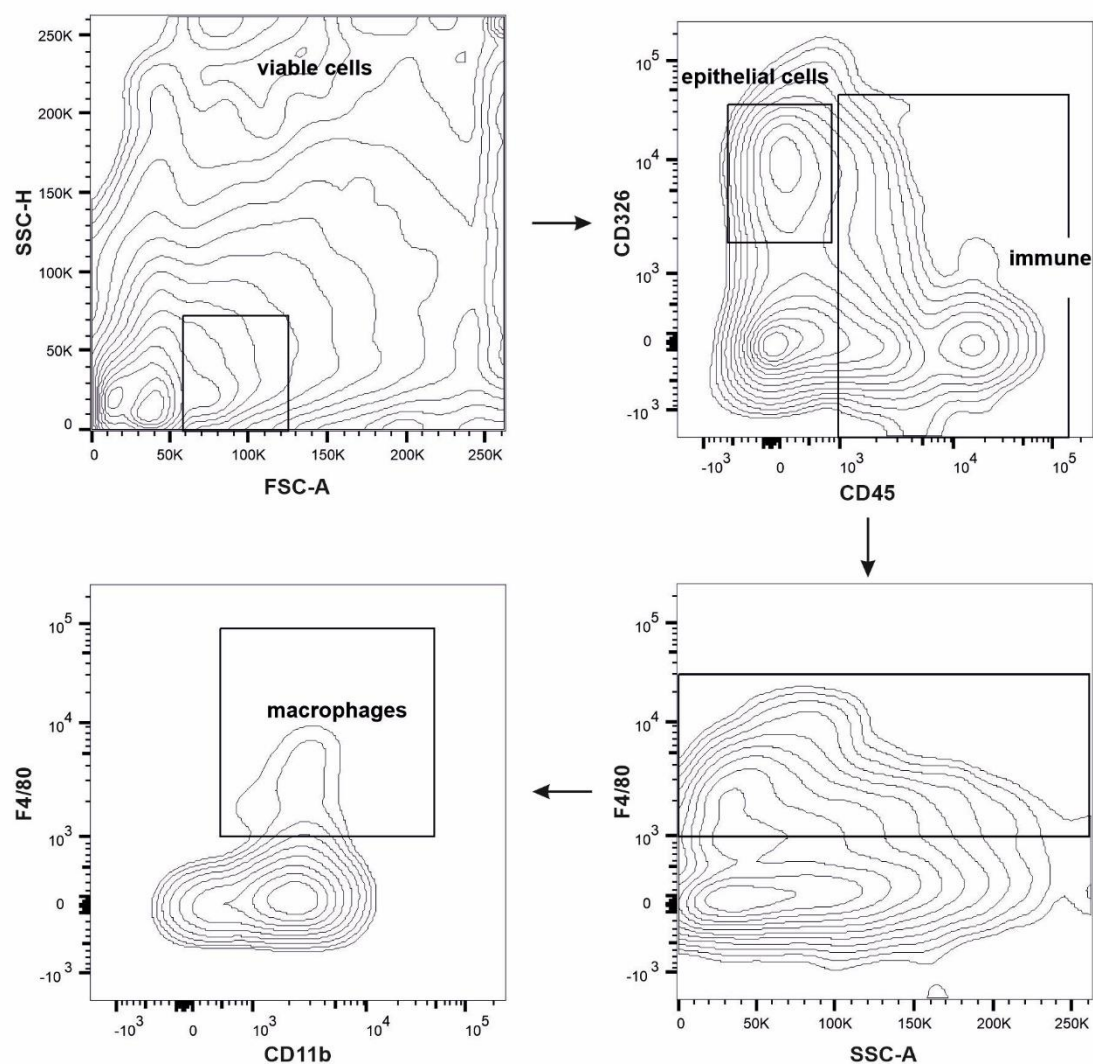

### Supplemental Figure S2: Gating strategy for cell sorting

Single cell suspensions of isolated renal tissue from Sham-operated or CLP-treated mice were stained with 7-AAD to detect viable cells and an antibody cocktail containing CD326, CD45, F4/80, and CD11b. Cell suspensions were sorted using a FACS Aria (BD) FACS sorter, resulting in CD45<sup>-</sup>/CD326<sup>+</sup> epithelial cells and CD45<sup>+</sup>/F4/80<sup>+</sup>/CD11b<sup>+</sup> MΦ.

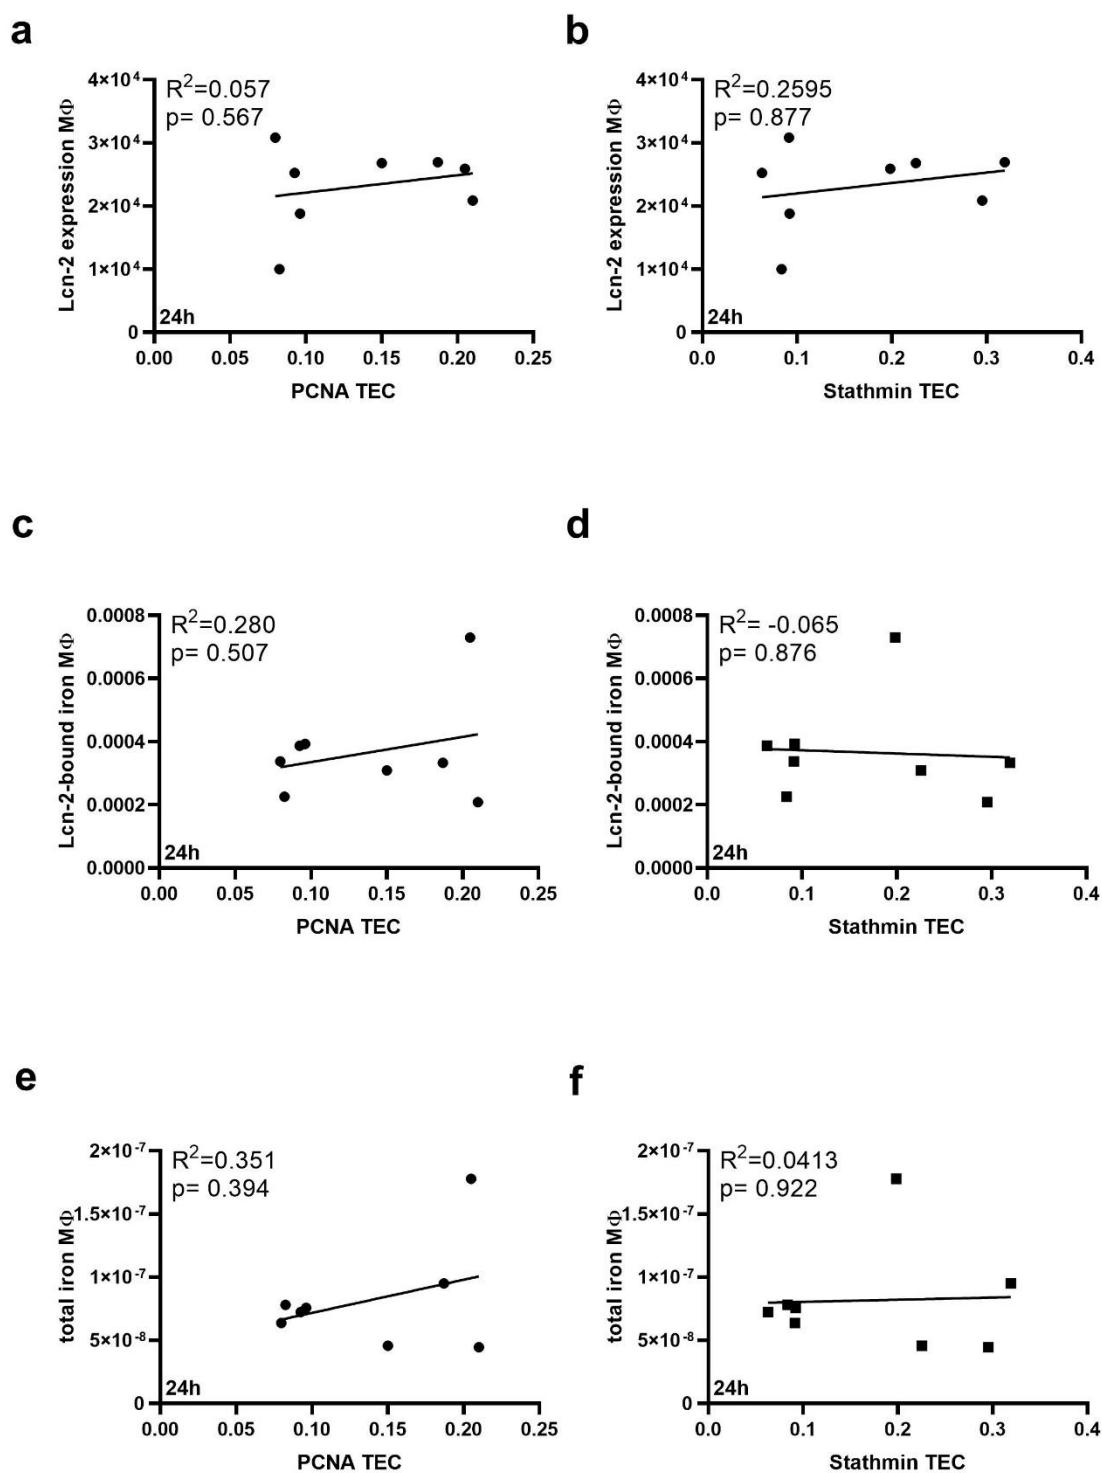

**Supplemental Figure S3: Correlation to renal recovery markers at 24 h after CLP treatment**

(a-f) Correlation between (a, c, e) PCNA or (b, d, f) Stathmin expression in TEC with either (a, b) Lcn-2 protein expression in renal MΦ, (c, d) Lcn-2-bound iron secreted from renal MΦ, or (e, f) total iron measured in the supernatant of renal MΦ (all values from the 24 h timepoint after CLP were included;  $R^2$  and  $p$ -values are depicted in the individual graph).

**Supplemental table S1:** Histological scoring.

Kidney damage was assessed by evaluating histology via PAS staining. Poor (+), moderate (++), and severe (+++) scoring was applied and kidney sections were analyzed by screening for tubular detachment, tubular dilatation, tubular vacuoles, inflammatory infiltrate, and glomerular sclerosis. 5 independent mice were analyzed from Sham- and CLP-treated animals (24 h and 48 h).

| Sample    | tubular detachment | tubular dilatation | tubular vacuoles | inflammatory infiltrate | glomerular sclerosis |
|-----------|--------------------|--------------------|------------------|-------------------------|----------------------|
| Sham_1    | +                  | +                  | +                | +                       | +                    |
| Sham_2    | +                  | -                  | -                | -                       | -                    |
| Sham_3    | +                  | -                  | -                | -                       | -                    |
| Sham_4    | +                  | -                  | -                | -                       | -                    |
| Sham_5    | +                  | -                  | -                | -                       | -                    |
| CLP 24h_1 | ++                 | ++                 | -                | ++                      | ++                   |
| CLP 24h_2 | ++                 | ++                 | -                | ++                      | +++                  |
| CLP 24h_3 | ++                 | +                  | -                | ++                      | +++                  |
| CLP 24h_4 | ++                 | ++                 | -                | +++                     | +++                  |
| CLP 24h_5 | +                  | ++                 | -                | ++                      | ++                   |
| CLP 48h_1 | +                  | ++                 | -                | +                       | -                    |
| CLP 48h_2 | +                  | ++                 | -                | +                       | -                    |
| CLP 48h_3 | +                  | +                  | -                | -                       | -                    |
| CLP 48h_4 | +                  | +                  | -                | -                       | -                    |
| CLP 48h_5 | +                  | +                  | -                | ++                      | +                    |
